# Supplementary material for: Regorafenib plus toripalimab in patients with metastatic colorectal cancer: a phase Ib/II clinical trial and gut microbiome analysis
Source: PubMed Central journal article supplement (PMC8484502; doi:10.1016/j.xcrm.2021.100383), 2021-08-27
Supplement: mmc1.pdf [file mmc1.pdf]

**Cell Reports Medicine, Volume 2**

**Supplemental information**

**Regorafenib plus toripalimab in  
patients with metastatic colorectal cancer: a phase  
Ib/II clinical trial and gut microbiome analysis**

**Feng Wang, Ming-Ming He, Yi-Chen Yao, Xia Zhao, Zhi-Qiang Wang, Ying Jin, Hui-Yan Luo, Ji-Bin Li, Feng-Hua Wang, Miao-Zhen Qiu, Zhi-Da Lv, De-Shen Wang, Yu-Hong Li, Dong-Sheng Zhang, and Rui-Hua Xu**

**Supplementary Table S1. Summary of adverse events for RP2D (Relates to Table 2)**

|                                             |           |
|---------------------------------------------|-----------|
| Patients (%)                                | 39 (100)  |
| Overall adverse events                      | 37 (94.9) |
| Treatment-related adverse events (TRAE)     | 37 (94.9) |
| Grade 3 TRAE                                | 15(38.5)  |
| Grade 4-5 TRAEs or Treatment-related deaths | 0 (0)     |
| Immune-related adverse events (irAEs)       | 24 (61.5) |
| Grade 3 irAEs                               | 5 (12.8)  |
| Grade 4-5 irAEs                             | 0 (0)     |
| Severe adverse events                       | 0 (0)     |
| Dose reduction due to TRAE                  | 1 (2.5)   |
| Treatment delay due to TRAE                 | 3 (7.7)   |
| Discontinuation due to TRAE                 | 10 (25.6) |

Footnotes: RP2D, recommended dose; TRAE: treatment-related adverse events; irAE, immune-related adverse events

**Supplementary Table S3. Results of LefSe analysis (Related to Figure 4)**

| Species name                                                                                                             | group | Mean     | LDA score | P value  |
|--------------------------------------------------------------------------------------------------------------------------|-------|----------|-----------|----------|
| p_Desulfovibrionia.o_Desulfovibrionales                                                                                  | NR    | 3.771166 | 3.355917  | 0.02738  |
| p_Desulfovibrionia.o_Desulfovibrionales.f_Desulfovibrionaceae.g_Bilophila.s_uncultured_bacterium_g_Bilophila             | NR    | 3.528756 | 3.079563  | 0.020388 |
| p_Bacteroidia.o_Bacteroidales.f_Marinifilaceae                                                                           | NR    | 4.058242 | 3.709976  | 0.044985 |
| p_Firmicutes.c_Clostridia.o_Lachnospirales.f_Lachnospiraceae.g_Lachnoclostridium.s_unclassified_g_Lachnoclostridium      | NR    | 4.020956 | 3.454932  | 0.024981 |
| p_Bacteroidia.o_Bacteroidales.f_Rikenellaceae.g_Alistipes                                                                | NR    | 4.286034 | 3.88121   | 0.038471 |
| p_Desulfovibrionia                                                                                                       | NR    | 3.771166 | 3.355917  | 0.02738  |
| p_Fusobacteriia.o_Fusobacteriales.f_Fusobacteriaceae                                                                     | NR    | 4.175258 | 3.829314  | 0.007349 |
| p_Firmicutes.c_Negativicutes.o_Acidaminococcales                                                                         | NR    | 4.427439 | 3.982389  | 0.02687  |
| p_Desulfovibrionia                                                                                                       | NR    | 3.771166 | 3.355917  | 0.02738  |
| p_Fusobacteriia.o_Fusobacteriales                                                                                        | NR    | 4.17551  | 3.829568  | 0.006522 |
| p_Bacteroidia.o_Bacteroidales.f_Rikenellaceae                                                                            | NR    | 4.286117 | 3.881285  | 0.034892 |
| p_Fusobacteriia.o_Fusobacteriales.f_Fusobacteriaceae.g_Fusobacterium.s_unclassified_g_Fusobacterium                      | NR    | 3.492524 | 3.108888  | 0.034073 |
| p_Firmicutes.c_Clostridia.o_Oscillospirales.f_Oscillospiraceae                                                           | NR    | 4.529602 | 4.023316  | 0.049535 |
| p_Fusobacteriia                                                                                                          | NR    | 4.17551  | 3.829568  | 0.006522 |
| p_Firmicutes.c_Negativicutes.o_Acidaminococcales.f_Acidaminococcaceae.g_Acidaminococcus.s_unclassified_g_Acidaminococcus | NR    | 3.800104 | 3.36105   | 0.022903 |
| p_Fusobacteriia                                                                                                          | NR    | 4.17551  | 3.829568  | 0.006522 |

|                                                                                                                                   |    |          |          |          |
|-----------------------------------------------------------------------------------------------------------------------------------|----|----------|----------|----------|
| p__Desulfobacterota.c__Desulfovibrionia.o__Desulfovibrionales.f__Desulfovibrionaceae                                              | NR | 3.771166 | 3.355917 | 0.02738  |
| p__Bacteroidota.c__Bacteroidia.o__Bacteroidales.f__Rikenellaceae.g__Alistipes.s__unclassified_g__Alistipes                        | NR | 4.157967 | 3.830633 | 0.018925 |
| p__Firmicutes.c__Negativicutes.o__Acidaminococcales.f__Acidaminococcaceae                                                         | NR | 4.427439 | 3.982389 | 0.02687  |
| p__Firmicutes.c__Negativicutes.o__Acidaminococcales.f__Acidaminococcaceae.g__Acidaminococcus                                      | NR | 3.922173 | 3.470986 | 0.021349 |
| p__Fusobacteriota.c__Fusobacteriia.o__Fusobacteriales.f__Fusobacteriaceae.g__Fusobacterium                                        | NR | 4.175258 | 3.829314 | 0.007349 |
| p__Desulfobacterota.c__Desulfovibrionia.o__Desulfovibrionales.f__Desulfovibrionaceae.g__Bilophila                                 | NR | 3.534177 | 3.083571 | 0.022659 |
| p__Firmicutes.c__Negativicutes.o__Veillonellales_Selenomonadales.f__Veillonellaceae.g__Dialister.s__Dialister_sp__Marseille_P5638 | R  | 4.212109 | 4.025834 | 0.039341 |
| p__Firmicutes.c__Negativicutes.o__Veillonellales_Selenomonadales                                                                  | R  | 5.138839 | 4.663844 | 0.022527 |

Footnotes: R, response (partial response or stable disease); NR, non-response (disease progression)

**Supplementary Table S4. Comparison of clinical characteristics between high- and low-*Fusobacterium* group based on the baseline stool samples (Related to Figure 4)**

| Variable                        | <i>Fusobacterium</i> |              | <i>p</i> -value <sup>a</sup> |
|---------------------------------|----------------------|--------------|------------------------------|
|                                 | High (n = 21)        | Low (n = 11) |                              |
| Gender = Male (%)               | 14 (66.7)            | 4 (36.4)     | 0.142                        |
| Age >60 (%)                     | 14 (66.7)            | 9 (81.8)     | 0.441                        |
| BMI >25 (%)                     | 7 (33.3)             | 3 (27.3)     | 1                            |
| History = Yes (%)               | 8 (38.1)             | 2 (18.2)     | 0.425                        |
| Smoking = Yes (%)               | 4 (19.0)             | 1 (9.1)      | 0.637                        |
| Drinking = Yes (%)              | 3 (14.3)             | 2 (18.2)     | 1                            |
| Anti-EGFR = Yes (%)             | 6 (28.6)             | 3 (27.3)     | 1                            |
| Anti-VEGF = Yes (%)             | 12 (57.1)            | 7 (63.6)     | 1                            |
| Liver metastasis = Yes (%)      | 18 (85.7)            | 6 (54.5)     | 0.088                        |
| Lung metastasis = Yes (%)       | 10 (47.6)            | 8 (72.7)     | 0.266                        |
| Lymph metastasis = Yes (%)      | 8 (38.1)             | 6 (54.5)     | 0.465                        |
| Peritoneal metastasis = Yes (%) | 6 (28.6)             | 4 (36.4)     | 0.703                        |
| Location = left (%)             | 12 (57.1)            | 10 (90.9)    | 0.106                        |
| KRAS = Yes (%)                  | 9 (45.0)             | 5 (45.5)     | 1                            |
| RAS = Yes (%)                   | 10 (50.0)            | 6 (54.5)     | 1                            |

Footnotes: <sup>a</sup> Fisher's exact test

**Supplementary Table S5. Abundance of *Fusobacterium* (Related to Figure 4)**

| patientID | Response | <i>Fusobacterium</i> |
|-----------|----------|----------------------|
| Patient18 | NR       | 0.005657264          |
| Patient04 | NR       | 0.000496321          |
| Patient46 | NR       | 2.00E-05             |
| Patient02 | NR       | 3.77E-05             |
| Patient05 | NR       | 0.002797855          |
| Patient21 | NR       | 0.241142461          |
| Patient17 | NR       | 0.003597608          |
| Patient20 | NR       | 0.000764259          |
| Patient31 | NR       | 0.002347594          |
| Patient30 | NR       | 9.05E-05             |
| Patient33 | NR       | 2.15E-05             |
| Patient38 | NR       | 0.000430626          |
| Patient44 | NR       | 1.88E-05             |
| Patient39 | NR       | 0.000960947          |
| Patient41 | NR       | 4.23E-05             |
| Patient36 | NR       | 0.037928427          |
| Patient29 | NR       | 0.000195366          |
| Patient34 | NR       | 0.017655703          |
| Patient22 | NR       | 0.000107793          |
| Patient08 | NR       | 4.07E-05             |
| Patient14 | NR       | 4.27E-05             |
| Patient13 | R        | 0                    |
| Patient32 | R        | 0                    |
| Patient03 | R        | 0                    |
| Patient06 | R        | 0.000789133          |
| Patient26 | R        | 1.98E-05             |
| Patient10 | R        | 0.000358646          |
| Patient11 | R        | 2.60E-05             |
| Patient35 | R        | 1.98E-05             |
| Patient24 | R        | 0                    |
| Patient19 | R        | 0.007977039          |
| Patient16 | R        | 2.14E-05             |

Footnotes: R, response (partial response or stable disease); NR, non-response (disease progression)

**Supplementary Table S6. Risk scores of patients based on prediction model (Related to Figure 4)**

| patientID | PFS | PFStime     | riskScore   | risk |
|-----------|-----|-------------|-------------|------|
| Patient13 | 1   | 6.333333333 | 1.565316774 | high |
| Patient32 | 1   | 4.266666667 | 0.612381398 | low  |
| Patient18 | 1   | 1.866666667 | 1.641554452 | high |
| Patient04 | 1   | 2.2         | 0.638848326 | low  |
| Patient03 | 1   | 11.4        | 0.609178696 | low  |
| Patient46 | 1   | 1.666666667 | 1.565316774 | high |
| Patient02 | 1   | 1.566666667 | 0.612381398 | low  |
| Patient05 | 1   | 2.033333333 | 1.641554452 | high |
| Patient06 | 1   | 3.8         | 0.638848326 | low  |
| Patient26 | 1   | 5.166666667 | 0.238322177 | low  |
| Patient10 | 1   | 4.233333333 | 1.641554452 | high |
| Patient21 | 1   | 1.666666667 | 4.196000607 | high |
| Patient17 | 1   | 1.966666667 | 1.632969262 | high |
| Patient11 | 1   | 7.266666667 | 0.609178696 | low  |
| Patient35 | 1   | 4.2         | 0.238322177 | low  |
| Patient20 | 1   | 1.233333333 | 4.196000607 | high |
| Patient24 | 0   | 6.7         | 0.612381398 | low  |
| Patient31 | 1   | 1.066666667 | 4.196000607 | high |
| Patient30 | 1   | 1.6         | 0.609178696 | low  |
| Patient33 | 1   | 1.9         | 0.238322177 | low  |
| Patient19 | 0   | 6.633333333 | 0.638848326 | low  |
| Patient16 | 0   | 8.3         | 0.238322177 | low  |
| Patient38 | 1   | 2.3         | 1.632969262 | high |
| Patient44 | 1   | 2.266666667 | 1.565316774 | high |
| Patient39 | 1   | 1.966666667 | 1.641554452 | high |
| Patient41 | 1   | 1.966666667 | 0.609178696 | low  |
| Patient36 | 1   | 2.566666667 | 1.641554452 | high |
| Patient29 | 1   | 1.866666667 | 1.641554452 | high |
| Patient34 | 1   | 2.766666667 | 1.632969262 | high |
| Patient22 | 1   | 2.033333333 | 1.632969262 | high |
| Patient08 | 1   | 2.033333333 | 0.609178696 | low  |
| Patient14 | 1   | 1.233333333 | 1.565316774 | high |

Footnotes: 1, patient reached disease progression; 0, patient did not reach disease progression

Figure S1

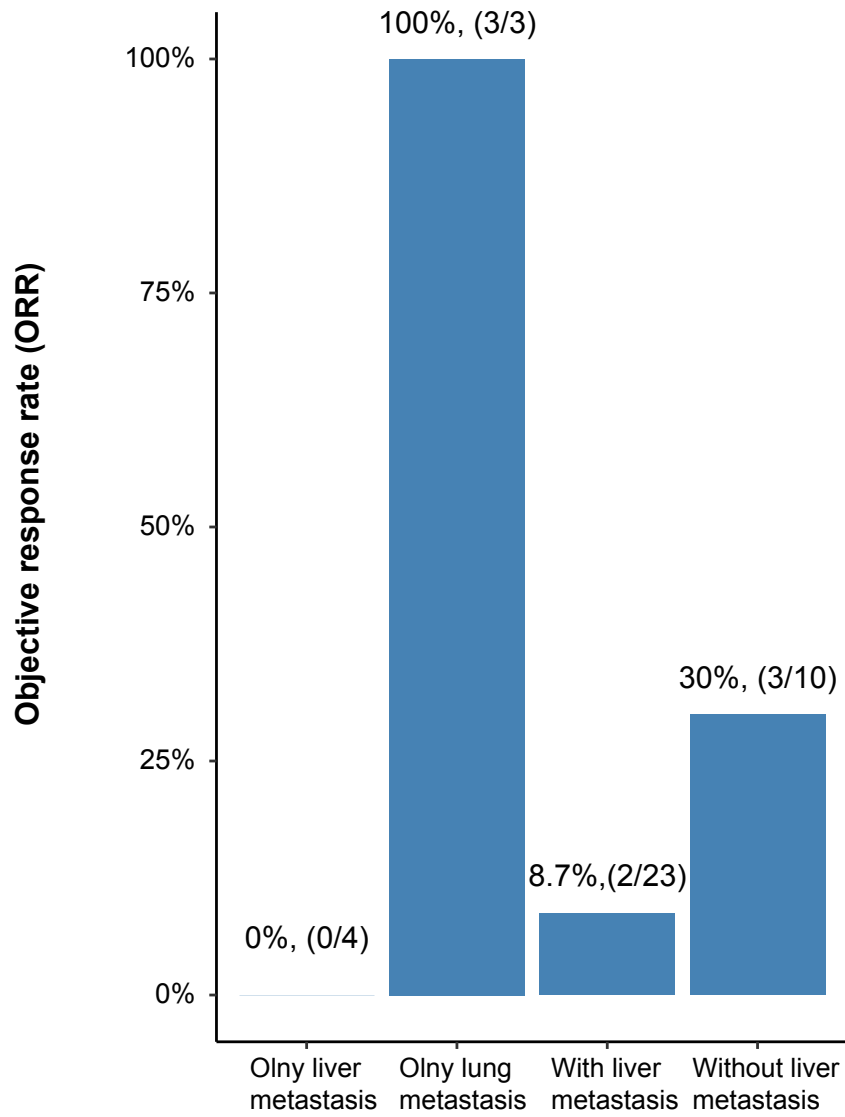

Figure S1. Objective response rate (ORR) of patients with liver metastases, without liver metastases, only with lung metastases, only with liver metastases. Related to Table 3.



Figure S2

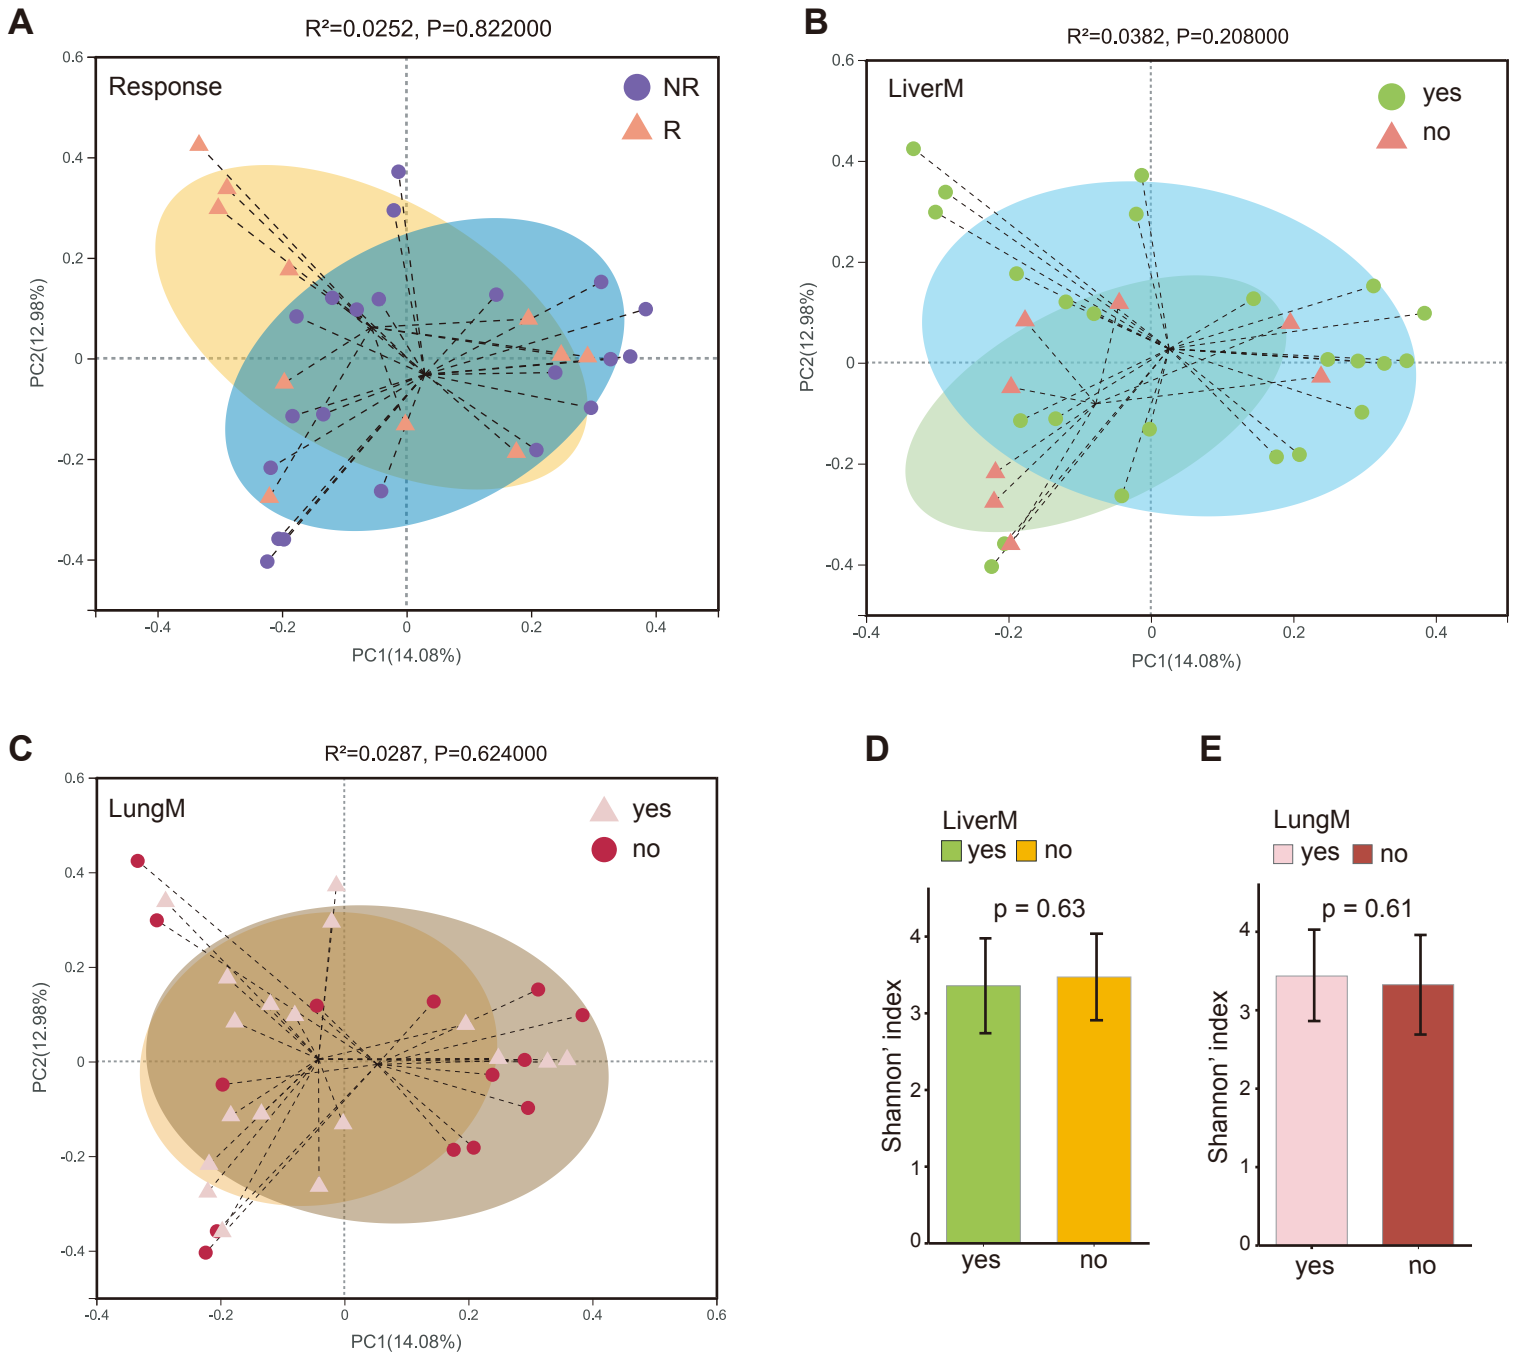

**Figure S2. Alpha and beta diversity analysis for the baseline gut microbiome. Related to Figure 4.** (A-C) Principal coordinates analysis (PCoA) of baseline bacterial OTUs based on the Bray-Curtis dissimilarity for the comparisons of R and NR (A), with and without metastases of liver (B) or lung (C). (D-E) Comparisons of alpha diversity of baseline bacterial OTUs for the patients with and without metastases of liver (D) or lung (E). Welch's t-test and PERMANOVA with 999 permutations were used to test the statistical differences for the alpha and beta diversity, respectively. LiverM: liver metastases; LungM: lung metastases; R, response; NR, non-response.

Figure S3

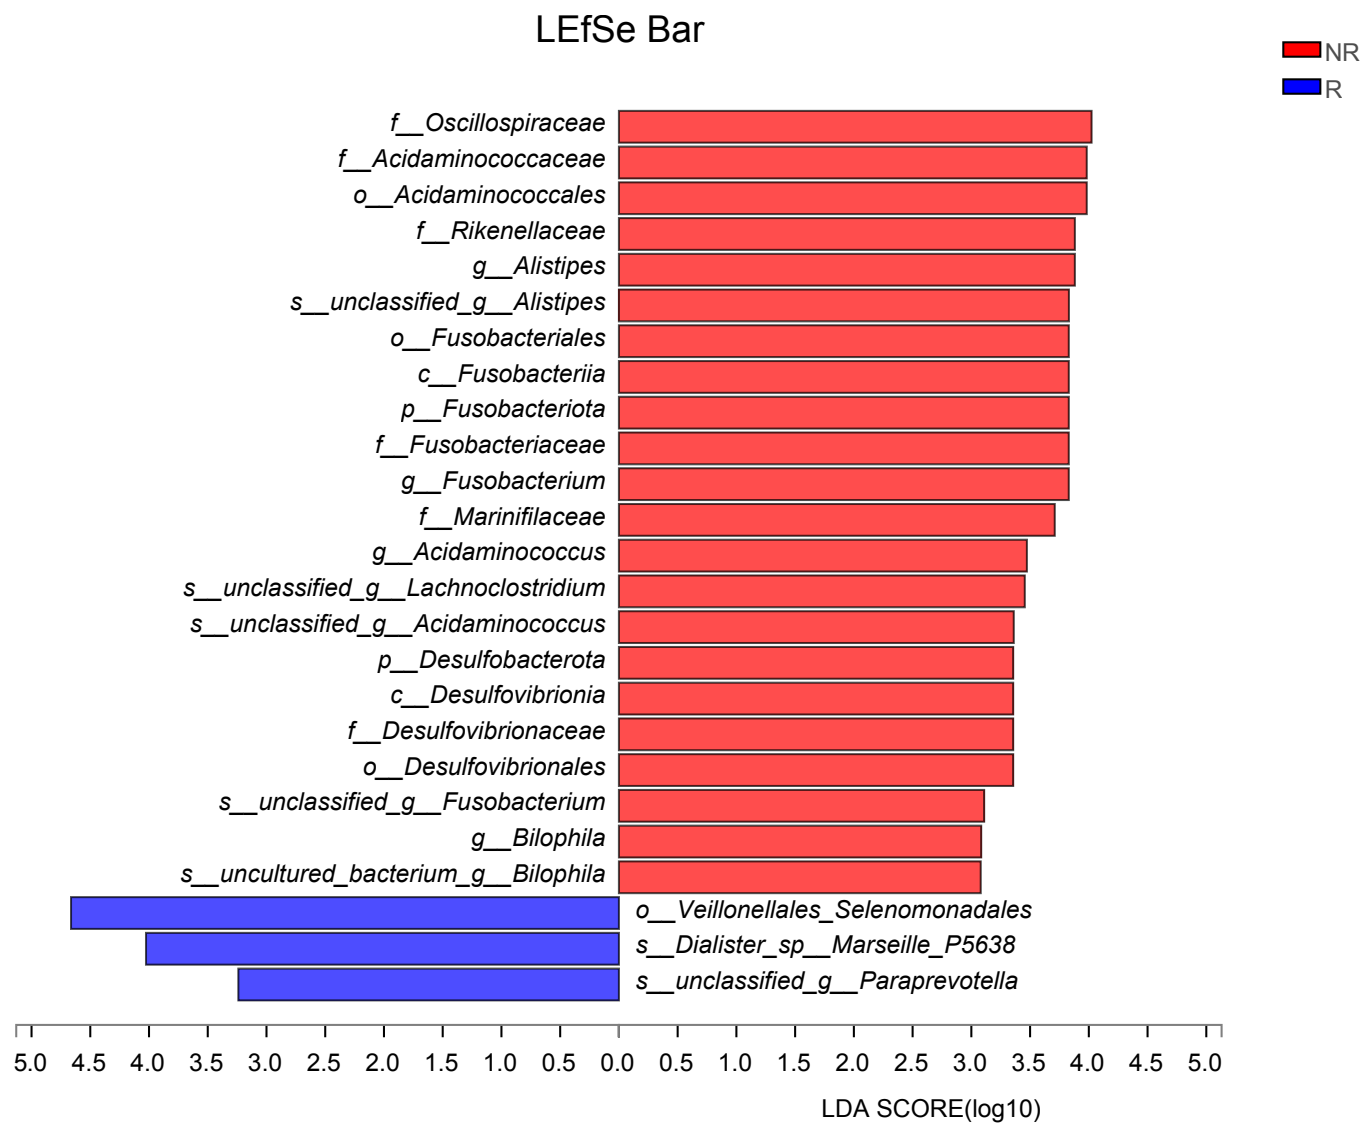

Figure S3. Linear discriminant analysis effect size (LDA) from phylum to species level shows differentially enriched taxa in NR and R groups. Related to Figure 4. R, response; NR, non-response.

Figure S4

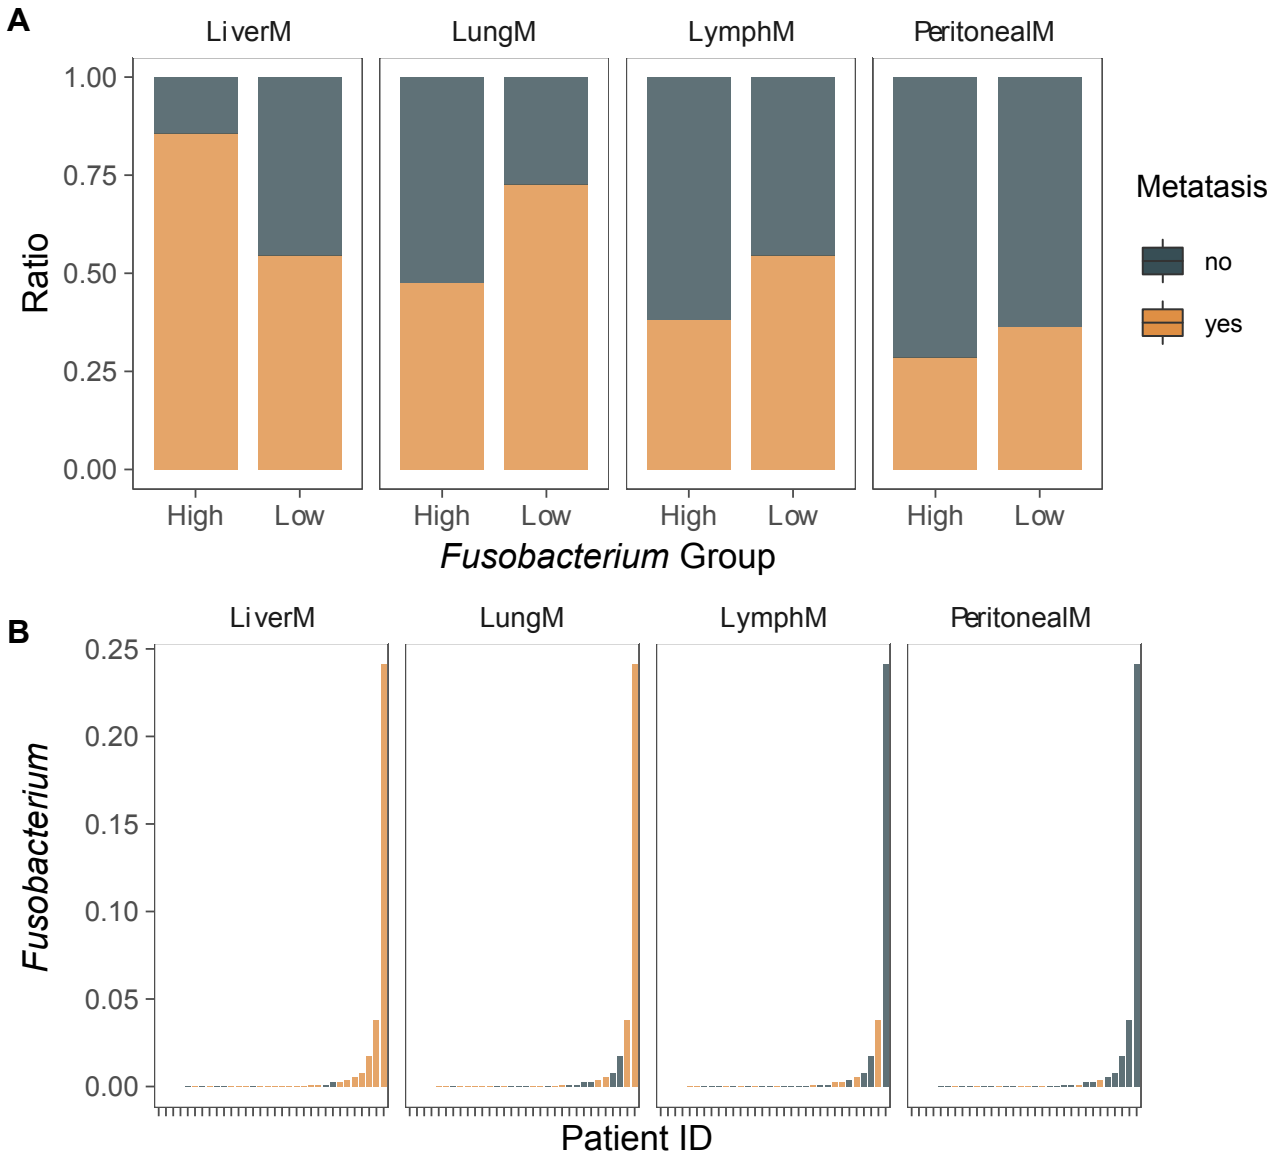

**Figure S4. Comparison of the *Fusobacterium* in baseline fecal samples for different metastatic sites. Related to Table 3 and Figure 4. (A)** The ratio of the patients with (yes) and without (no) metastases in high-/low- *Fusobacterium* group. **(B)** Relative abundance of *Fusobacterium* in patients with/without metastases for different metastatic sites. LiverM: liver metastases; LungM: lung metastases; LymphM: lymph node metastases; PeritonealM: peritoneal metastasis.
